# Supplementary material
Source: PubMed Central journal article supplement (PMC7929074)
Supplement: 2048872620937165-supplemental_material.pdf [file 2048872620937165-supplemental_material.pdf]

Supplementary table 1. Systematic literature review search terms and strategy.

|                                                                                                                                                                                                                                                                                                                                                                                                                                                                     |
|---------------------------------------------------------------------------------------------------------------------------------------------------------------------------------------------------------------------------------------------------------------------------------------------------------------------------------------------------------------------------------------------------------------------------------------------------------------------|
| <b>Search terms for PubMed</b>                                                                                                                                                                                                                                                                                                                                                                                                                                      |
| #1 (“Severe acute respiratory syndrome coronavirus 2”[Mesh] OR “Severe acute respiratory syndrome coronavirus 2”[Title/Abstract] OR “SARS-CoV-2”[Title/Abstract] OR “COVID-19”[Mesh] OR “COVID-19”[Title/Abstract] OR “Novel Coronavirus” [Title/Abstract] OR “2019-nCoV”[Title/Abstract])                                                                                                                                                                          |
| #2 (“Cardiovascular Disease”[Mesh] OR “Cardiovascular Disease”[Title/Abstract] OR “Heart”[Mesh] OR “Heart”[Title/Abstract] OR “Troponin I”[Mesh] OR “Troponin I”[Title/Abstract] OR “Creatine Kinase”[Mesh] OR “Creatine Kinase”[Title/Abstract] OR “Creatine Kinase, MB Form”[Mesh] OR “Creatine Kinase, MB Form”[Title/Abstract] OR “Myoglobin”[Mesh] OR “Myoglobin”[Title/Abstract] OR “Lactate Dehydrogenase”[Mesh] OR “Lactate Dehydrogenase”[Title/Abstract]) |
| #1 AND #2                                                                                                                                                                                                                                                                                                                                                                                                                                                           |
| <b>Search terms for Scopus</b>                                                                                                                                                                                                                                                                                                                                                                                                                                      |
| #1 (“Severe acute respiratory syndrome coronavirus 2” OR “SARS-CoV-2” OR “COVID-19” OR “Novel Coronavirus” OR “2019-nCoV”): Title/Abstract/Keyword                                                                                                                                                                                                                                                                                                                  |
| #2 (“Cardiovascular Disease” OR “Heart” OR “Troponin I” OR “Creatine Kinase” OR “Creatine Kinase, MB Form” OR “Myoglobin” OR “Lactate Dehydrogenase”): Title/Abstract/Keyword                                                                                                                                                                                                                                                                                       |
| #1 AND #2                                                                                                                                                                                                                                                                                                                                                                                                                                                           |
| <b>Search terms for Web of Science</b>                                                                                                                                                                                                                                                                                                                                                                                                                              |
| #1. TS = (“Severe acute respiratory syndrome coronavirus 2” OR “SARS-CoV-2” OR “COVID-19” OR “Novel Coronavirus” OR “2019-nCoV”)                                                                                                                                                                                                                                                                                                                                    |
| #2. TS = (“Cardiovascular Disease” OR “Heart” OR “Troponin I” OR “Creatine Kinase” OR “Creatine Kinase, MB Form” OR “Myoglobin” OR “Lactate Dehydrogenase”)                                                                                                                                                                                                                                                                                                         |
| #3. #1 AND #2                                                                                                                                                                                                                                                                                                                                                                                                                                                       |
| <b>Search terms for Cochrane Library</b>                                                                                                                                                                                                                                                                                                                                                                                                                            |
| #1 (“Severe acute respiratory syndrome coronavirus 2” OR “SARS-CoV-2” OR “COVID-19” OR “Novel Coronavirus” OR “2019-nCoV”): Title/Abstract/Keyword                                                                                                                                                                                                                                                                                                                  |
| #2 (“Cardiovascular Disease” OR “Heart” OR “Troponin I” OR “Creatine Kinase” OR “Creatine Kinase, MB Form” OR “Myoglobin” OR “Lactate Dehydrogenase”): Title/Abstract/Keyword                                                                                                                                                                                                                                                                                       |
| #1 AND #2                                                                                                                                                                                                                                                                                                                                                                                                                                                           |

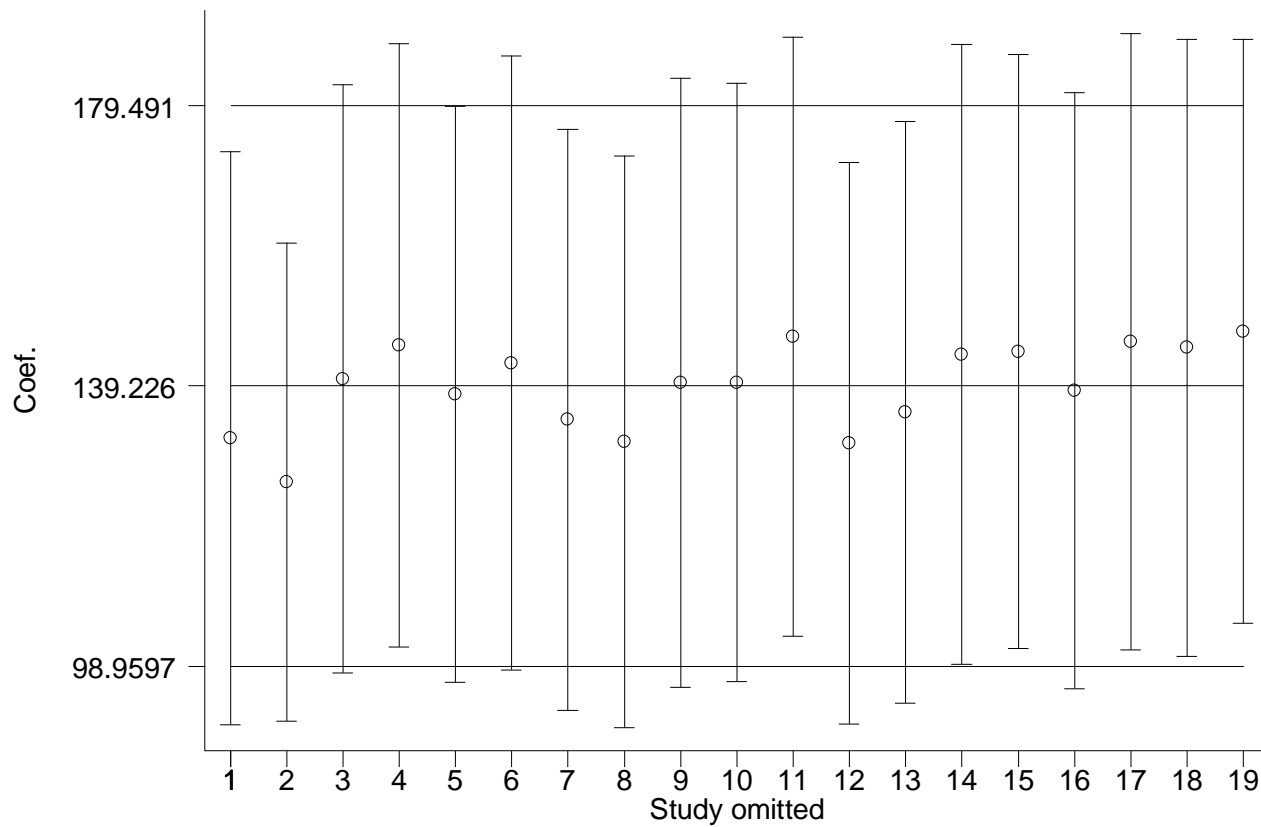

Supplementary Figure 1. Sensitivity analysis graph for the association between serum levels of lactate dehydrogenase and severity of COVID-19 infection. The results of the sensitivity analysis showed that no study had an obvious influence on the outcomes of this meta-analysis.

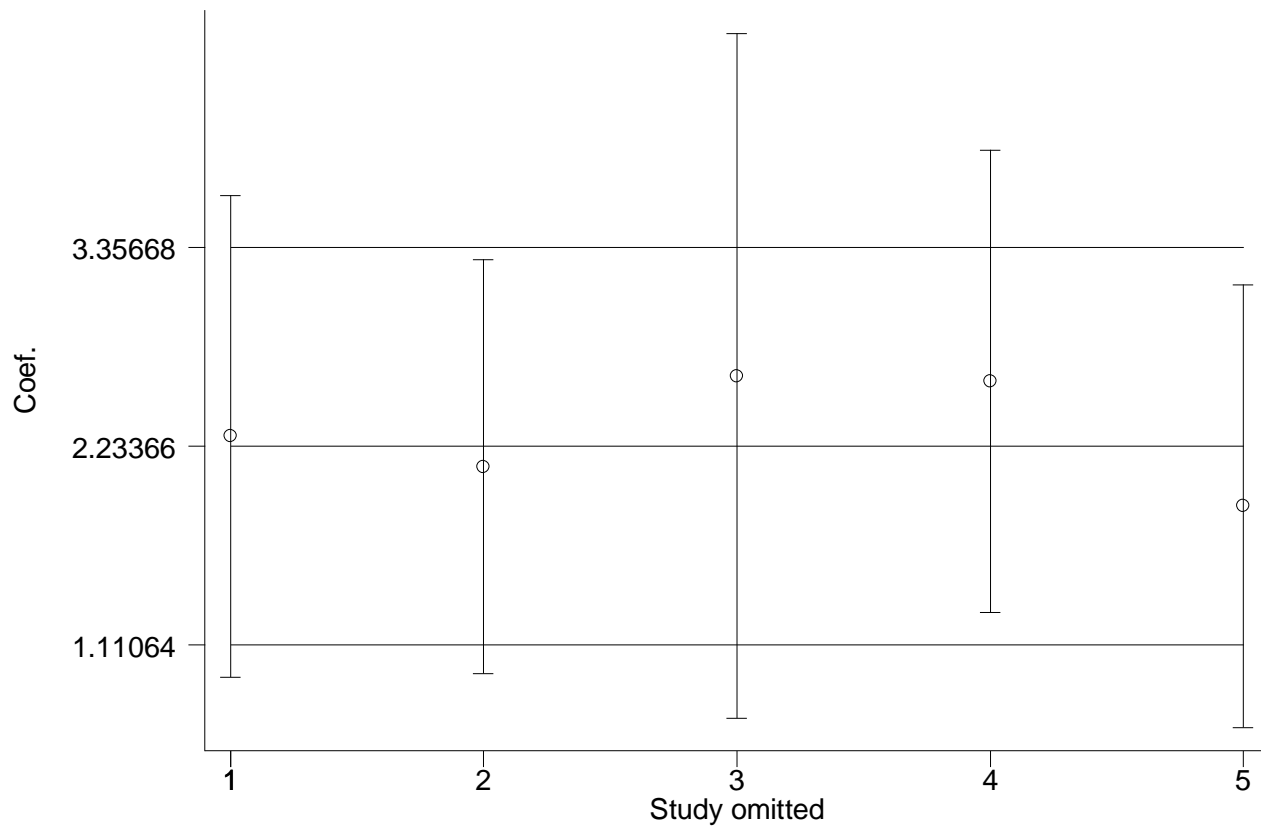

Supplementary Figure 2. Sensitivity analysis graph for the association between serum levels of creatine kinase-MB and severity of COVID-19 infection. The results of the sensitivity analysis showed that no study had an obvious influence on the outcomes of this meta-analysis.

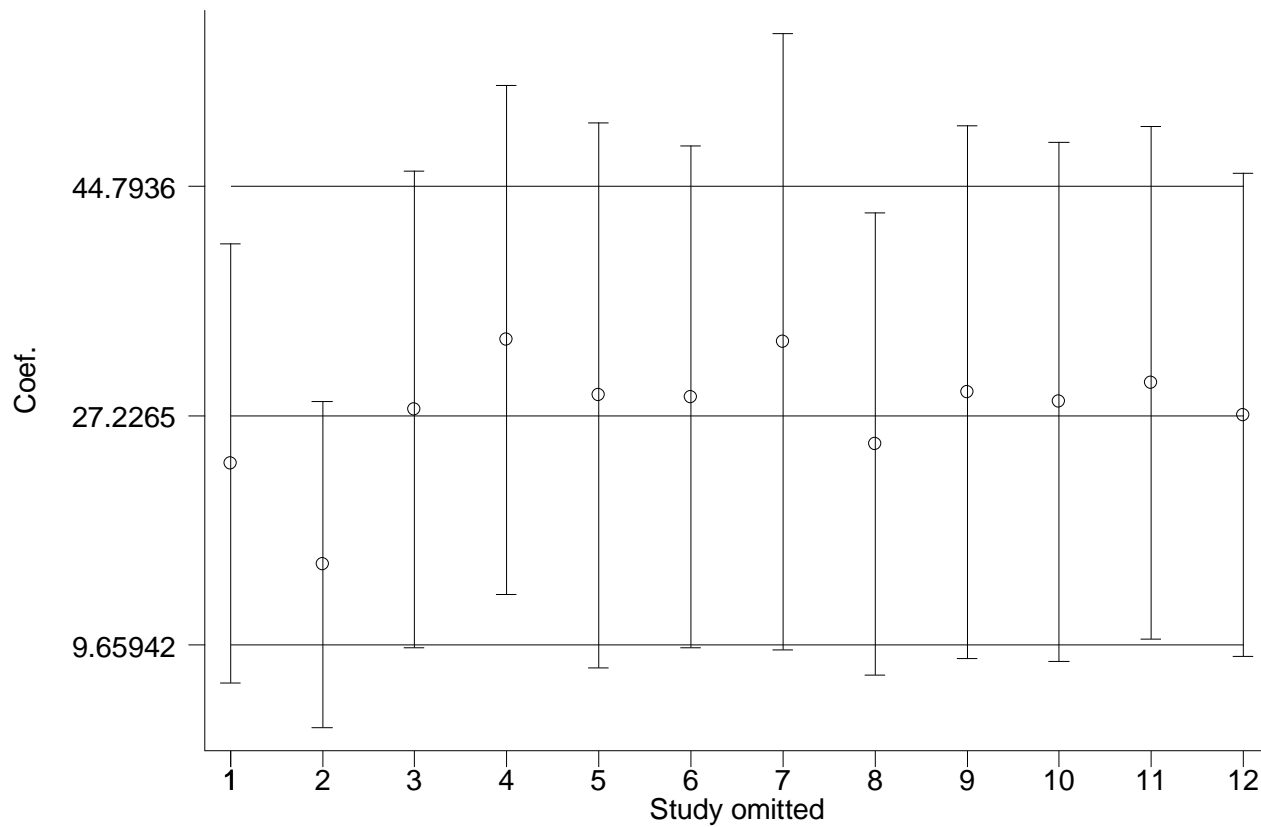

Supplementary Figure 3. Sensitivity analysis graph for the association between serum levels of creatine kinase and severity of COVID-19 infection. The results of the sensitivity analysis showed that no study had an obvious influence on the outcomes of this meta-analysis.

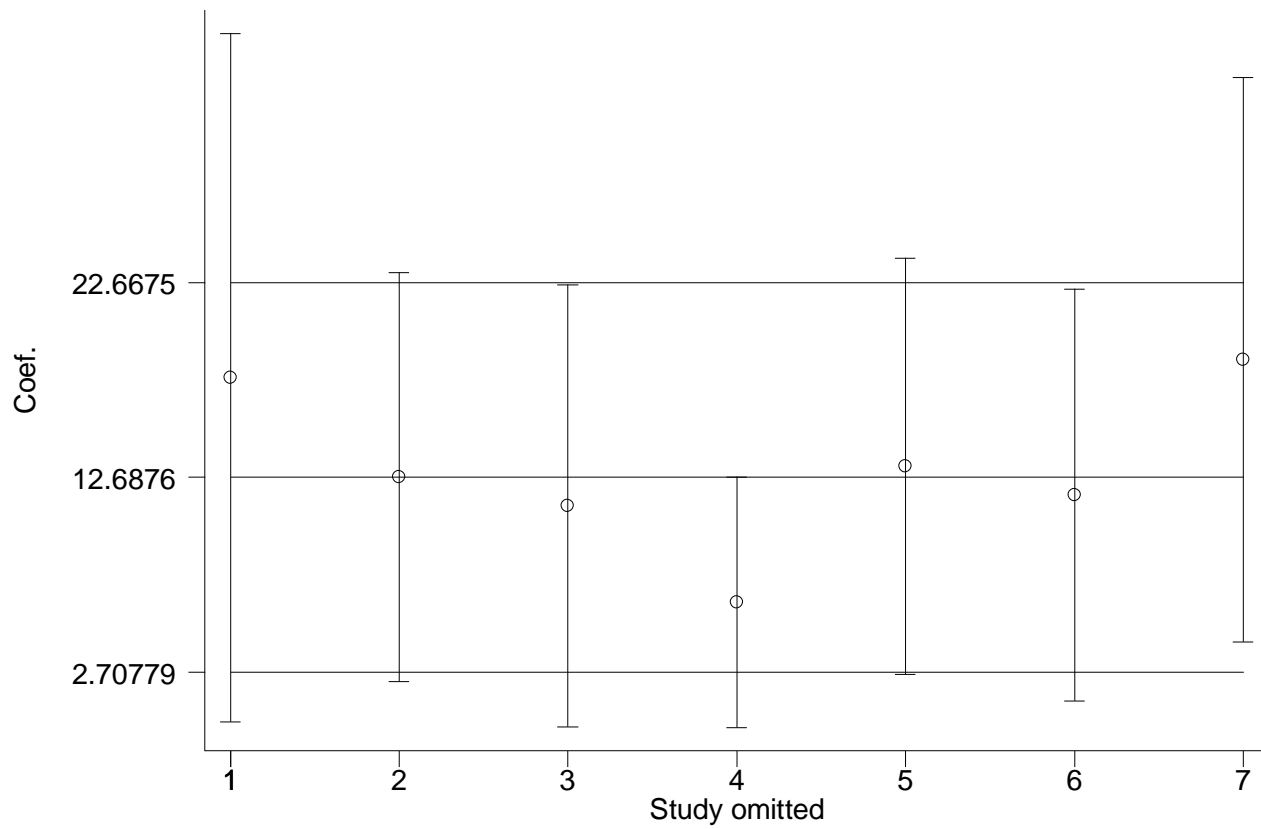

Supplementary Figure 4. Sensitivity analysis graph for the association between serum levels of cardiac troponin I and severity of COVID-19 infection. The results of the sensitivity analysis showed that no study had an obvious influence on the outcomes of this meta-analysis.

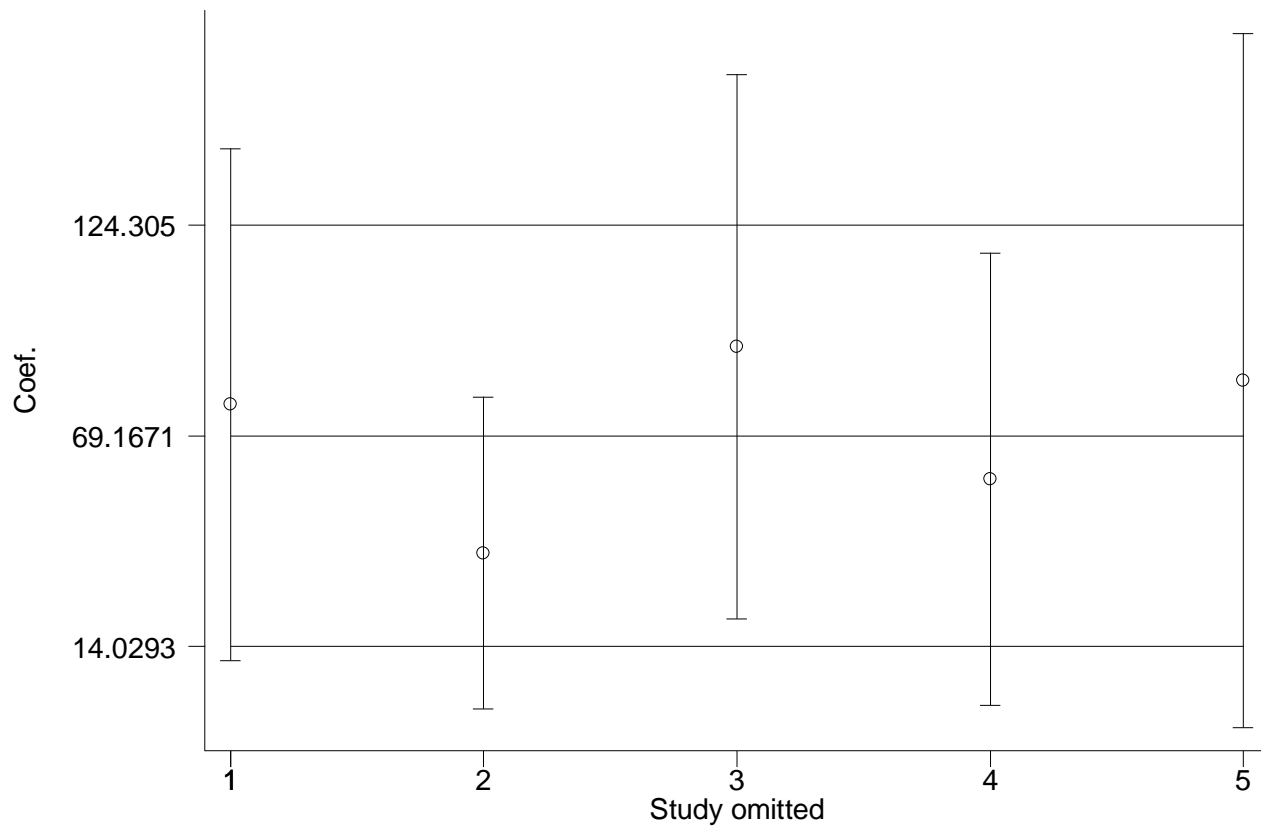

Supplementary Figure 5. Sensitivity analysis graph for the association between serum levels of myoglobin and severity of COVID-19 infection. The results of the sensitivity analysis showed that no study had an obvious influence on the outcomes of this meta-analysis.
